# Supplementary material for: Disrupting the HDAC6-ubiquitin interaction impairs infection by influenza and Zika virus and cellular stress pathways
Source: PubMed Central journal article supplement — Cell Rep. 2022 Apr 26;39(4):110736. doi: 10.1016/j.celrep.2022.110736 (PMC9065369; doi:10.1016/j.celrep.2022.110736), 2022-04-26
Supplement: mmc1.pdf [file mmc1.pdf]

**Cell Reports, Volume 39**

**Supplemental information**

**Disrupting the HDAC6-ubiquitin interaction**

**impairs infection by influenza and Zika**

**virus and cellular stress pathways**

**Longlong Wang, Etori Aguiar Moreira, Georg Kempf, Yasuyuki Miyake, Blandina I. Oliveira Esteves, Amal Fahmi, Jonas V. Schaefer, Birgit Dreier, Yohei Yamauchi, Marco P. Alves, Andreas Plückthun, and Patrick Matthias**

Figure S1

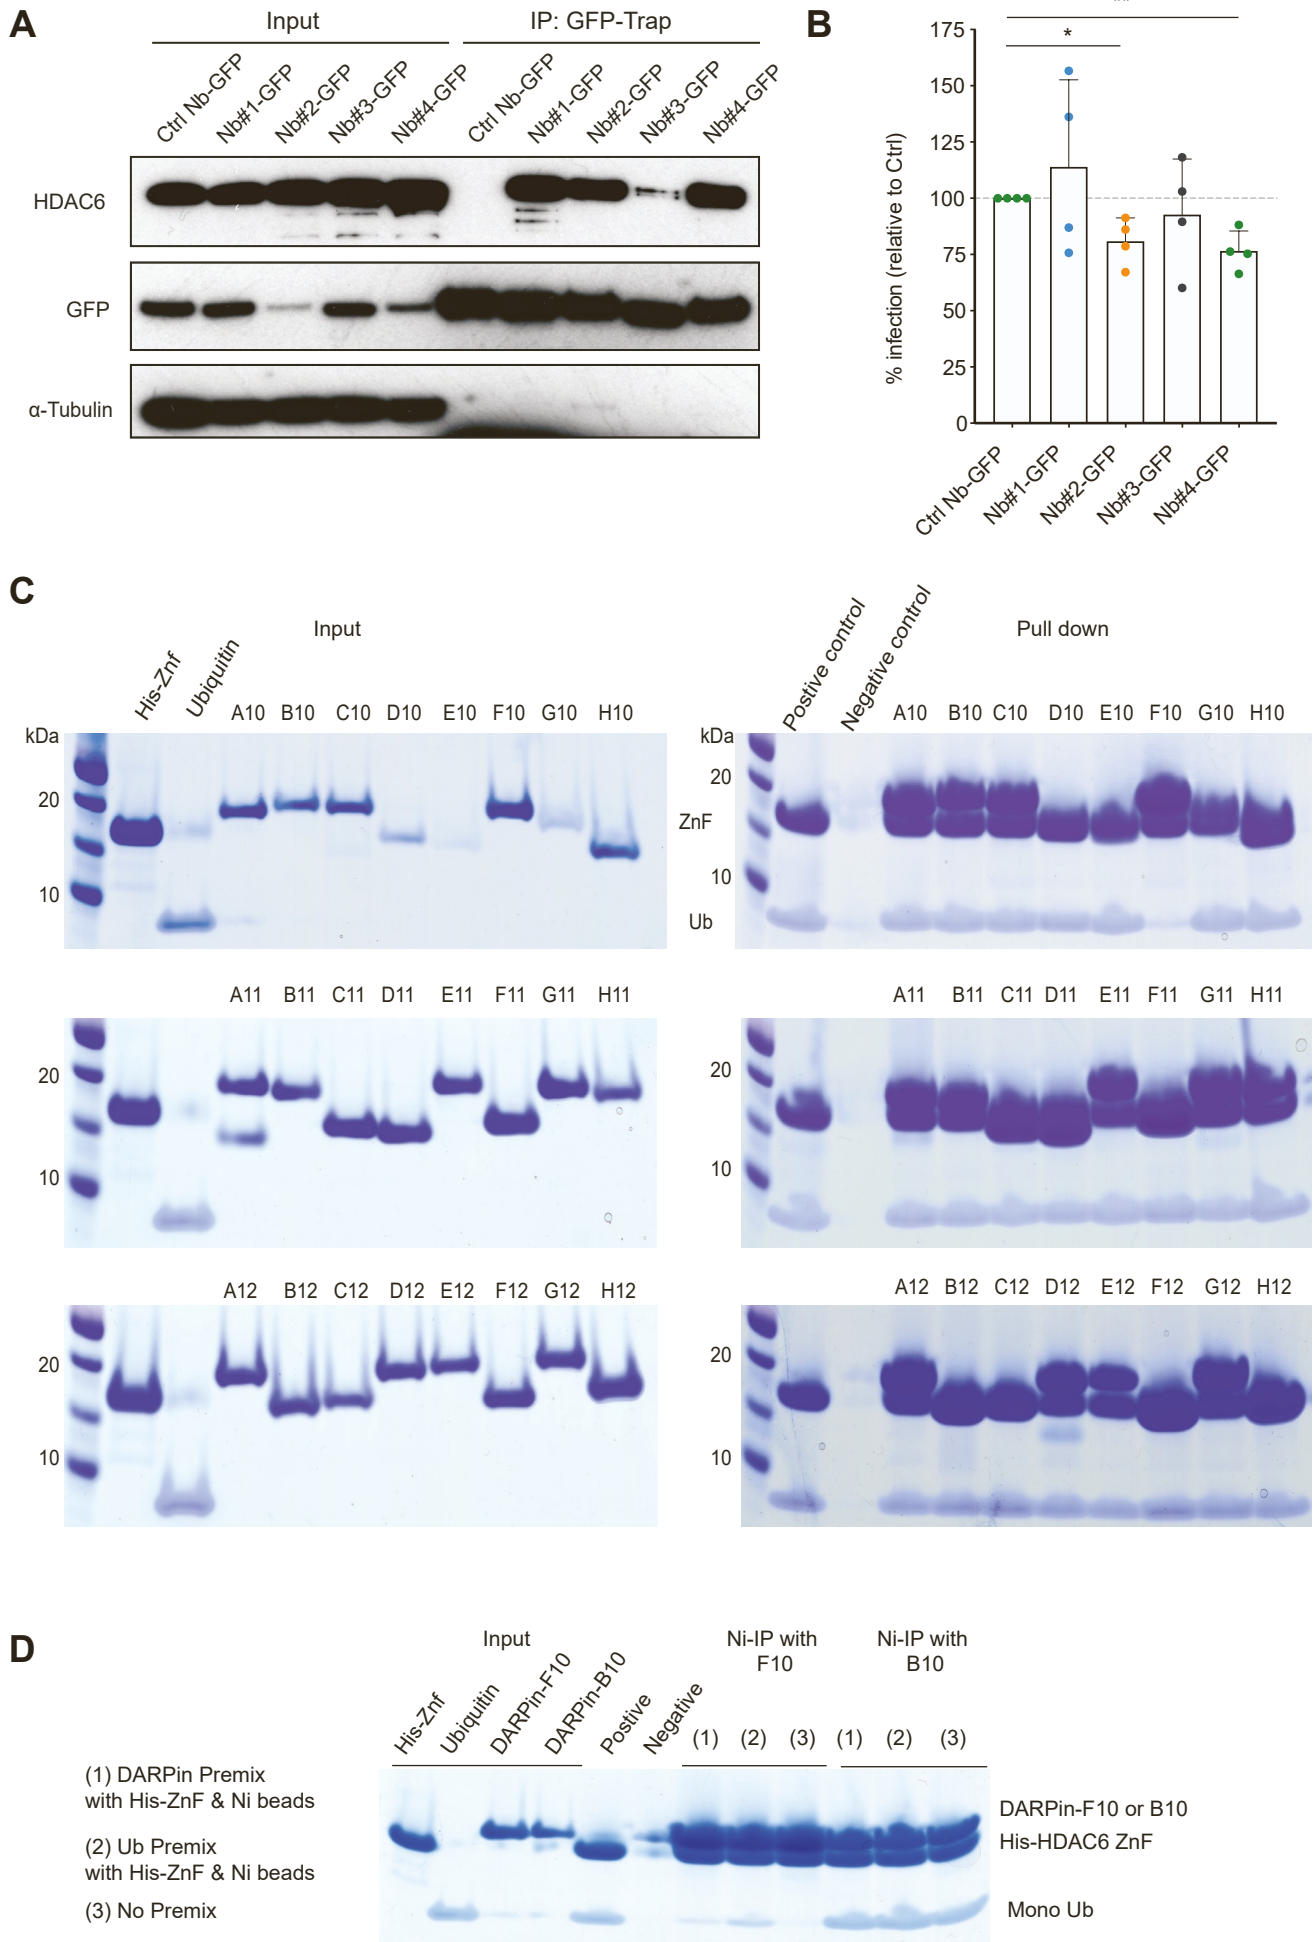

**Figure S1 (related to Figure 1). HDAC6 ZnF interacting Nanobodies' effect on IAV infection and screen for DARPins blocking the HDAC6 ZnF-Ub interaction.**

(A) A549 cells stably expressing nanobodies against HDAC6 ZnF were used for lysate preparation followed by pull-down with anti-GFP beads. The precipitate was analysed by SDS-PAGE and immunoblotted for HDAC6, GFP, and Tubulin. The input lanes were loaded with five percent of the lysate.

(B) IAV infection was analysed in A549 cells stably expressing the HDAC6 ZnF nanobodies (n=3). Infectivity was normalised to the control nanobody. Statistical analysis is done with One-way Anova, p-values refer to significant (<0.05) differences between samples. \*, p < 0.05; \*\*, p < 0.01. Data is represented as mean ± SD.

(C) Purified His-tagged HDAC6 ZnF (1108-1215), Flag-tagged DARPins candidates (A10-H10, A11-H11, A12-H12) and mono-ubiquitin were incubated together with Ni-NTA beads for 30 min, followed by precipitation and elution from the beads. Samples were analyzed by SDS-PAGE and visualized with Coomassie protein stain. As visible on the input panel, the size of the different DARPins varies slightly, depending on whether they have four or five loops. If a DARPins interacts with the ZnF domain without disturbing the binding of ubiquitin, pull-down of the ZnF domain via its His tag results in all three proteins being precipitated (pull-down panel). In the case of DARPins F10, ubiquitin is not precipitated, indicating that F10 binding interferes with ubiquitin binding.

(D) DARPins F10, and B10 as a control, were used for order of addition experiments. In (1) the DARPins was pre-mixed with His-ZnF, followed by ubiquitin addition 30 min later; in (2) Ub was pre-mixed with His-ZnF, followed by DARPins addition 30 min later; in (3) all three proteins were mixed together at the same time, followed by incubation for 60 min. Following the incubation, the ZnF domain was captured, and analysis was done by SDS-PAGE and Coomassie staining, as in (A) above. As shown, even when Ub is first pre-mixed with the ZnF domain, its binding is displaced by addition of DARPins F10.

Figure S2

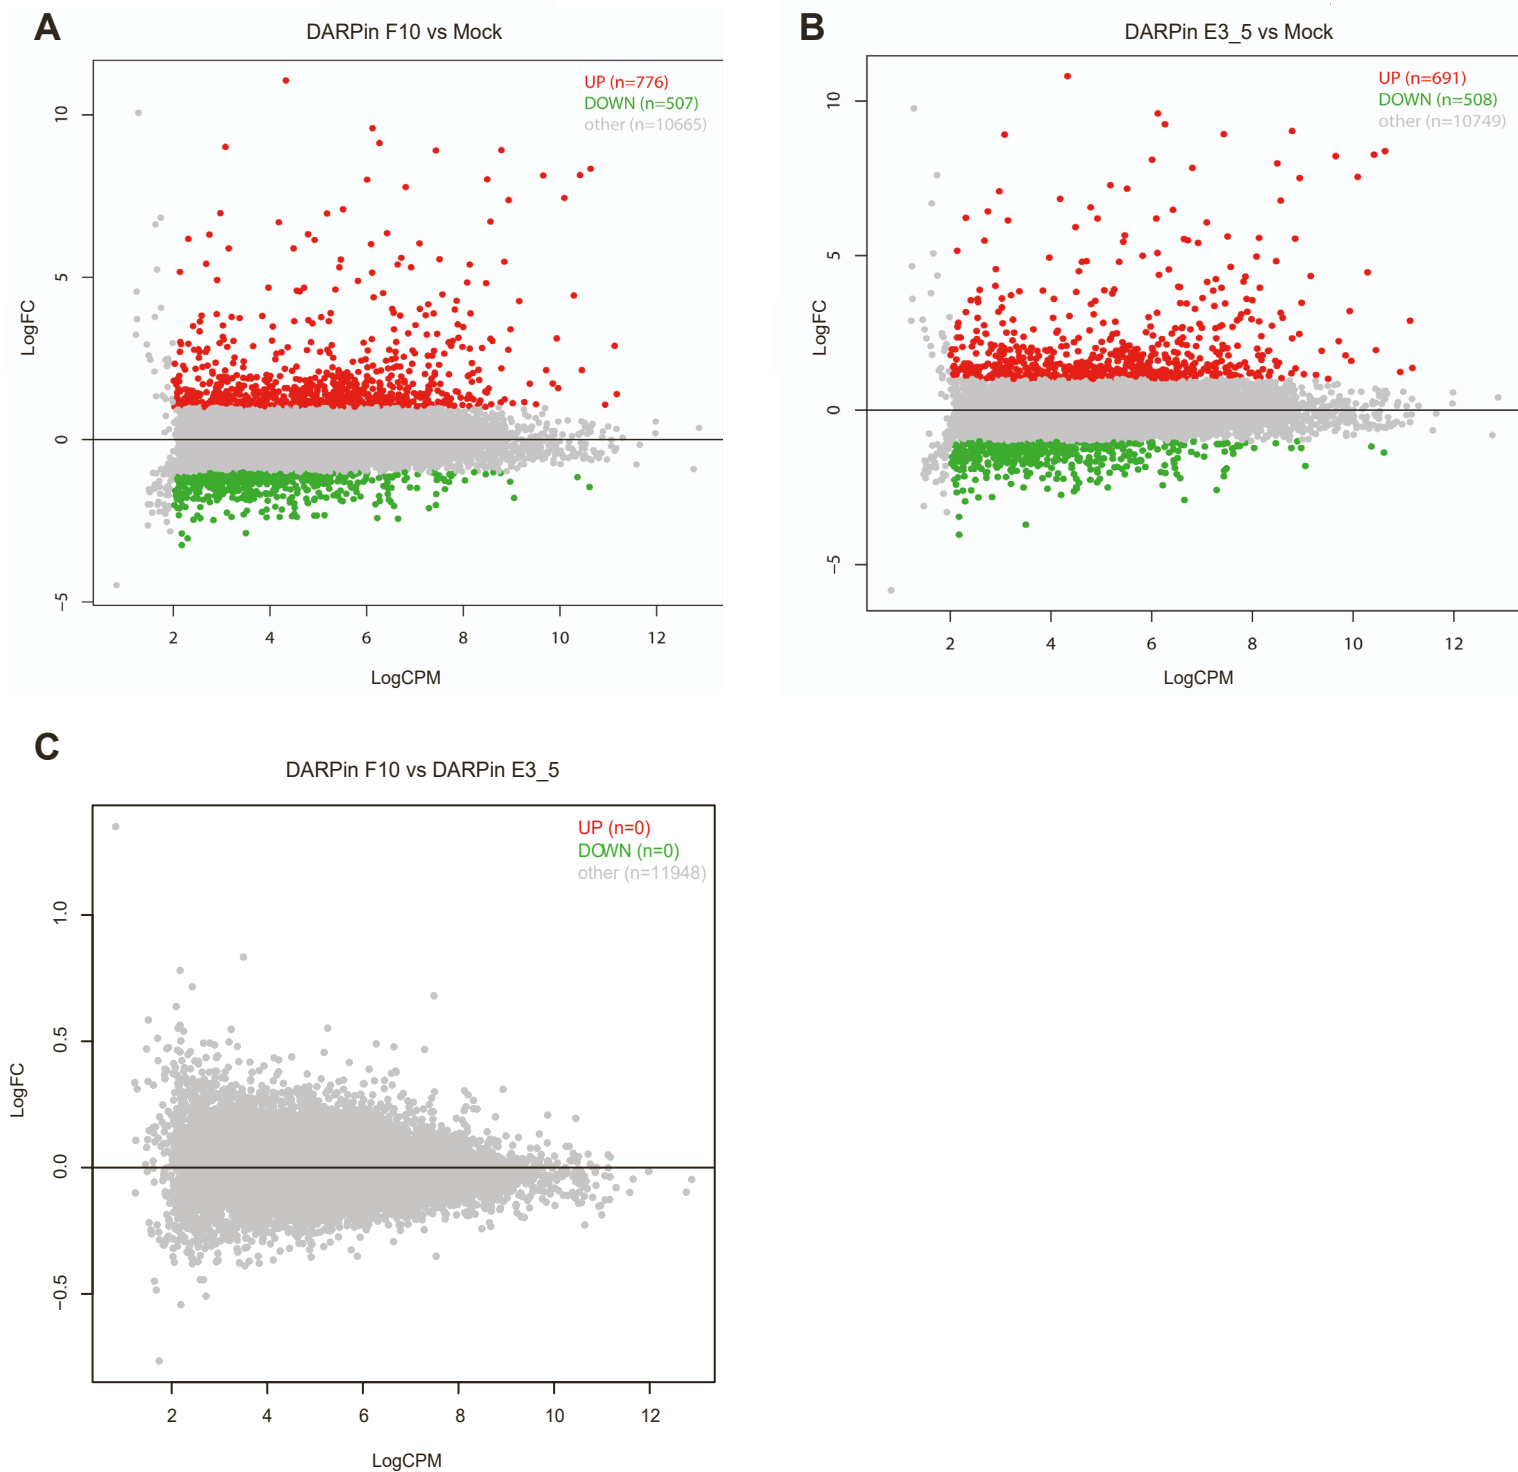

**Figure S2 (related to Figure 1). Expression of DARPin F10 has no specific impact on gene expression**

A549 cells were transiently transfected with GFP-tagged DARPin F10 or control DARPin E3\_5, or mock transfected; three days after transfection GFP-positive cells were sorted by FACS and total RNA was extracted and analyzed by RNA-seq. The log<sub>2</sub> fold change of the different pairwise comparisons (A, F10 vs mock-transfected; B, E3\_5 vs mock-transfected; C, F10 vs E3\_5) is displayed in MA plots. Differentially expressed genes (DEGs) are color-coded (fold change  $\geq 1$ , FDR < 0.01, logCPM > 2): red (green) data points represent genes with higher (lower) expression level in DARPin-transfected cells vs mock-transfected cells. Comparison of the DEGs between F10 and E3\_5 (C) shows that there are no specific gene expression changes between the two.

Figure S3

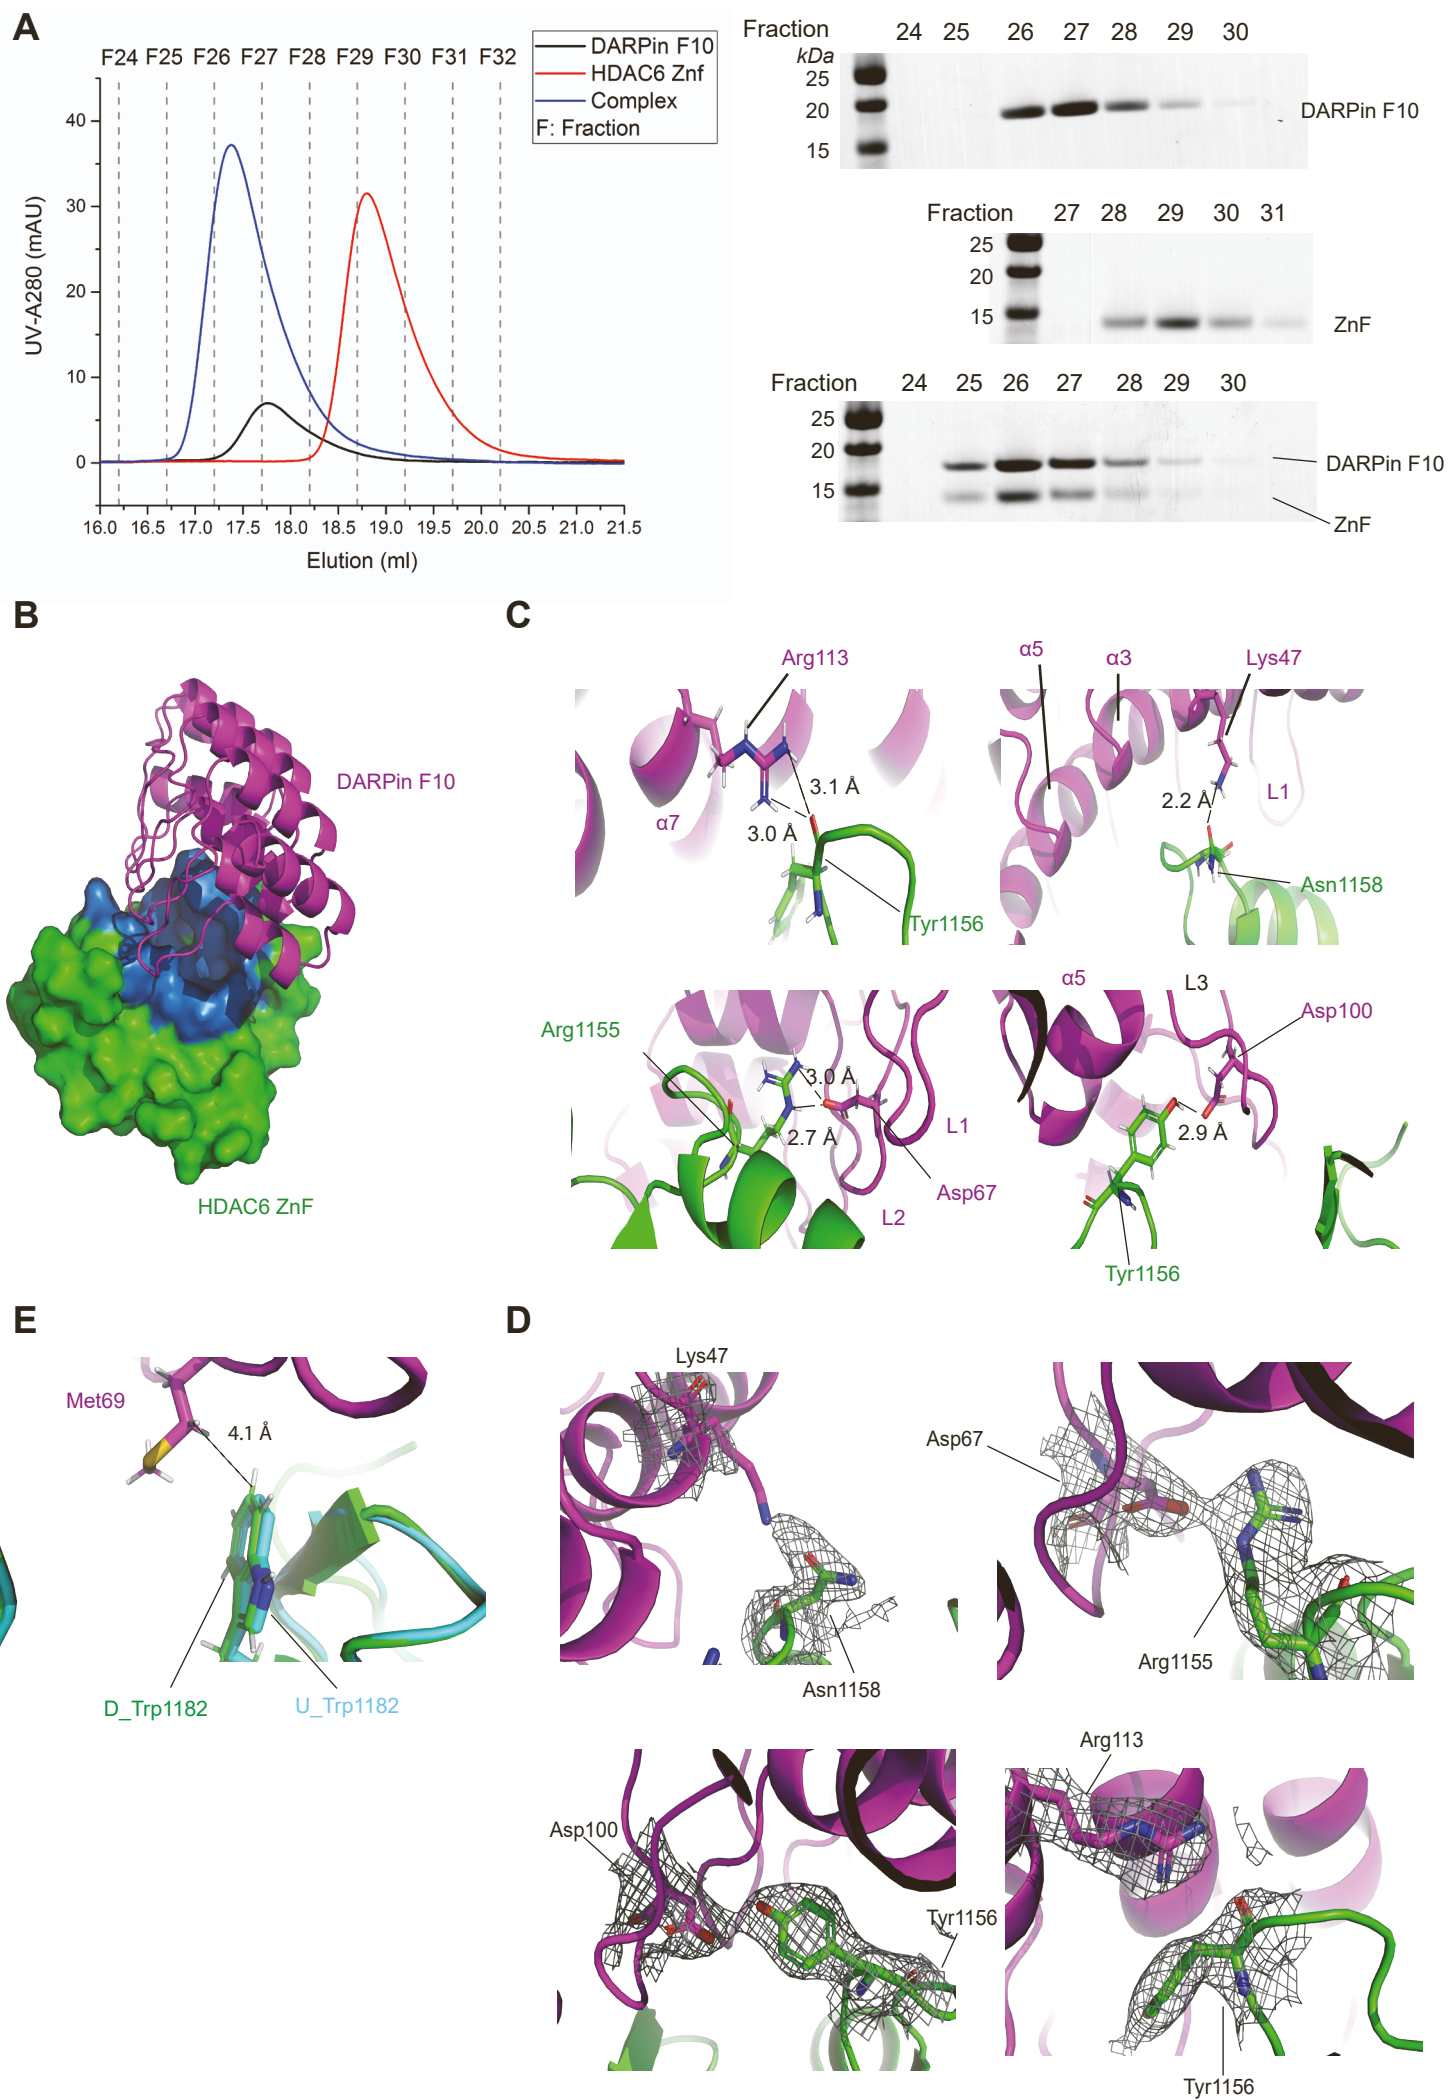

**Figure S3 (related to Figure 2). DARPin F10 forms a stable complex with the HDAC6 ZnF domain.**

(A) Size exclusion chromatography of purified DARPin F10 (black line), HDAC6 ZnF domain (red line) or the mixture of both (blue line). The upper graph shows the chromatographic profile. The lower panels show the analysis of indicated fractions by SDS-PAGE and Coomassie staining. The ZnF domain and DARPin F10 form a stable stoichiometric complex.

(B) DARPin F10  $\beta$ -turns/loops insert into ZnF (shown with surface representation, ZnF coloured in green, canyon-like cleft of ZnF coloured in blue).

(C) Key amino acids involved in ZnF-DARPin F10 polar interactions. The hydrogen bonds are shown by dashed lines with distances indicated.

(D) The key residues involved in interaction between the ZnF domain and DARPin F10 are shown with a contour level = 1 and a carve (radius around each selected atom for which to include density) = 2.4 Å. Electron density is shown as grey grid. HDAC6 ZnF, green; DARPin F10, purple.

(E) Trp1182 is not affected by DARPin F10 binding. Met69 from DARPin F10 (magenta) is shown to measure the distance to Trp1182 of the ZnF domain. D\_Trp1182: Trp1182 in DARPin-binding conformation (green); U\_Trp1182: Trp1182 in Ubiquitin-binding conformation (cyan).

Figure S4

His-F10<sup>KDDR</sup> mut (0.1 mM) VS ZnF (0.01 mM)

**A**

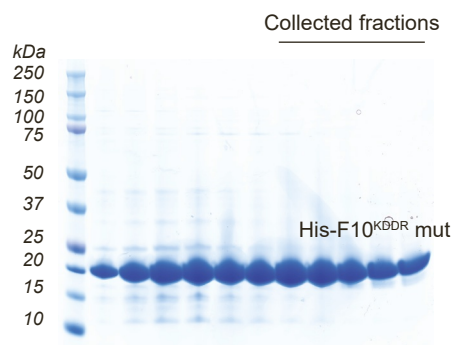

**B**

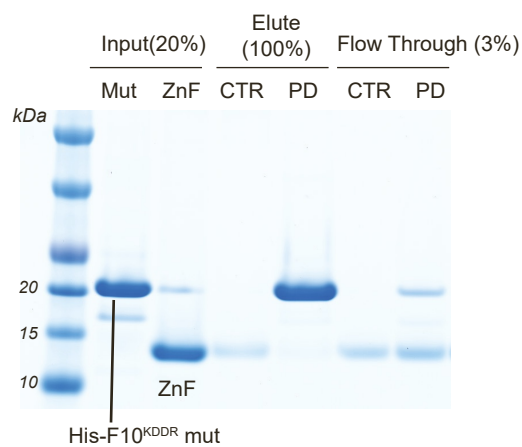

**C**

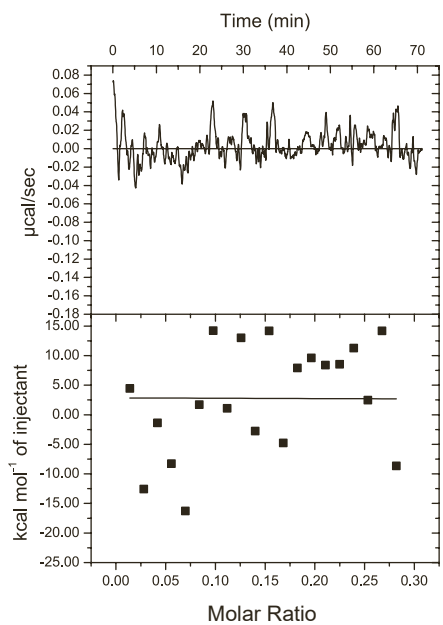

**D**

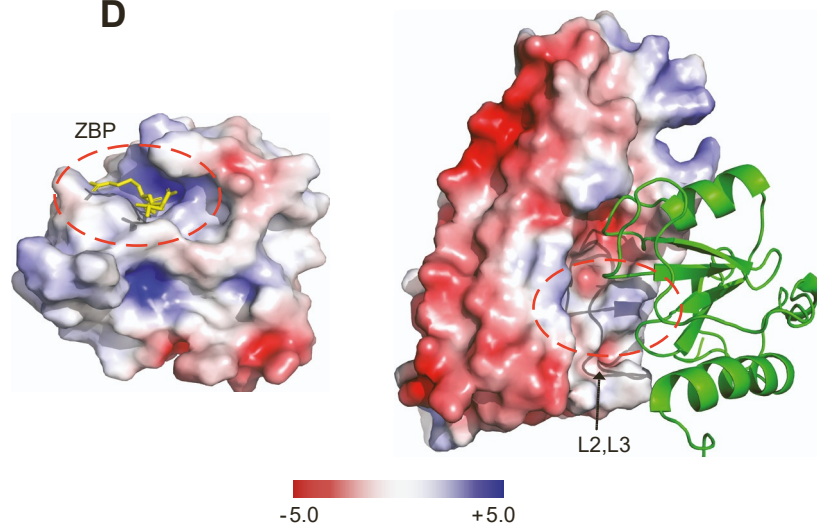

**F**

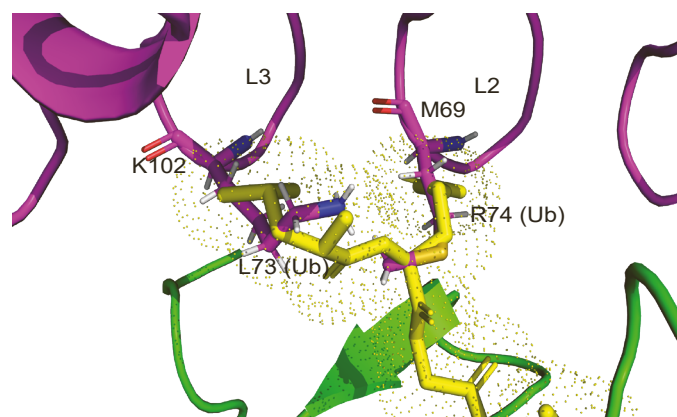

**E**

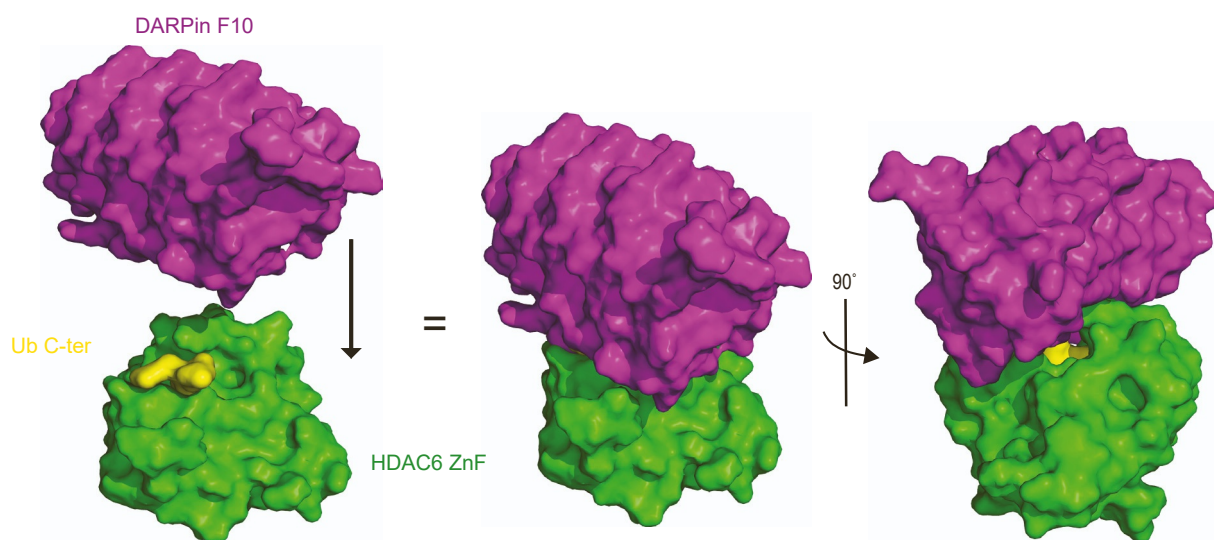

**Figure S4 (related to Figure 2). DARPin F10<sup>KDDR</sup> mutant does not bind to HDAC6 ZnF domain and Zoom-ins for DARPin F10 inhibition on Ub binding.**

(A) Purification of mutant F10 by gel filtration. DARPin F10 was mutated at 4 residues (K47A, D67A, D100A, and R113A) to generate His-F10<sup>KDDR</sup>. The protein was purified in gel filtration buffer (100 mM NaCl, 10 mM Tris pH=7.5, 2 mM TCEP) and the last 5 fractions were collected and pooled for further experiments.

(B) Pull down assay with HDAC6 ZnF(1108-1215). 10 µg His-F10<sup>KDDR</sup> and 15 ug HDAC6 ZnF were incubated together; 10 µl Ni-NTA beads (slurry) were added to pull down the DARPin (and test whether the ZnF domain is carried along). Precipitated proteins were eluted with TBS buffer supplemented with 250 mM imidazole and analyzed by SDS-PAGE followed by staining with Instant Blue. Mut: His-F10<sup>KDDR</sup>; ZnF, HDAC6 ZnF domain; CTR: Ni-NTA + HDAC6 ZnF; PD: Ni-NTA + HDAC6 ZnF + His-F10<sup>KDDR</sup>.

(C) ITC to measure the affinity between His-F10<sup>KDDR</sup> and HDAC6 ZnF. 0.1 mM and 0.01 mM protein were used respectively. No affinity was detected.

(D) Electrostatic surface potential map of the ZnF-Ub C-terminal complex structure (PDB: 3GV4). In the panel on the left, Ub is depicted as yellow sticks, showing that it fits into a positively charged pocket of the ZnF domain (ZnF electrostatic surface potential map is indicated). The ZnF Binding Pocket (ZBP) is shown. In the right panel, the electrostatic surface potential map of DARPin F10 is presented and the ZnF domain is shown (green). The region contacting the Ub-binding site (L2, L3, dashed circle) is neutral or slightly positively charged. Electrostatic surface potential maps were calculated with APBS (as PyMOL plugin) and range from -5 to +5 kT/e.

(E) Surface representation of the ZnF domain in complex with DARPin F10. Ubiquitin C-terminus is buried in the ZnF “canyon”. In the left panel, DARPin F10 and ZnF are moved apart for clarity. In the middle and right panels, the bound complex is shown, illustrating the occlusion of the Ub binding site by DARPin F10.

(F) DARPin F10 residues Lys102 (in L3) and Met69 (L2) occupy the space where the Ub C-terminus would engage. DARPin F10, purple; ZnF domain, green; Ub, yellow.



Figure S5

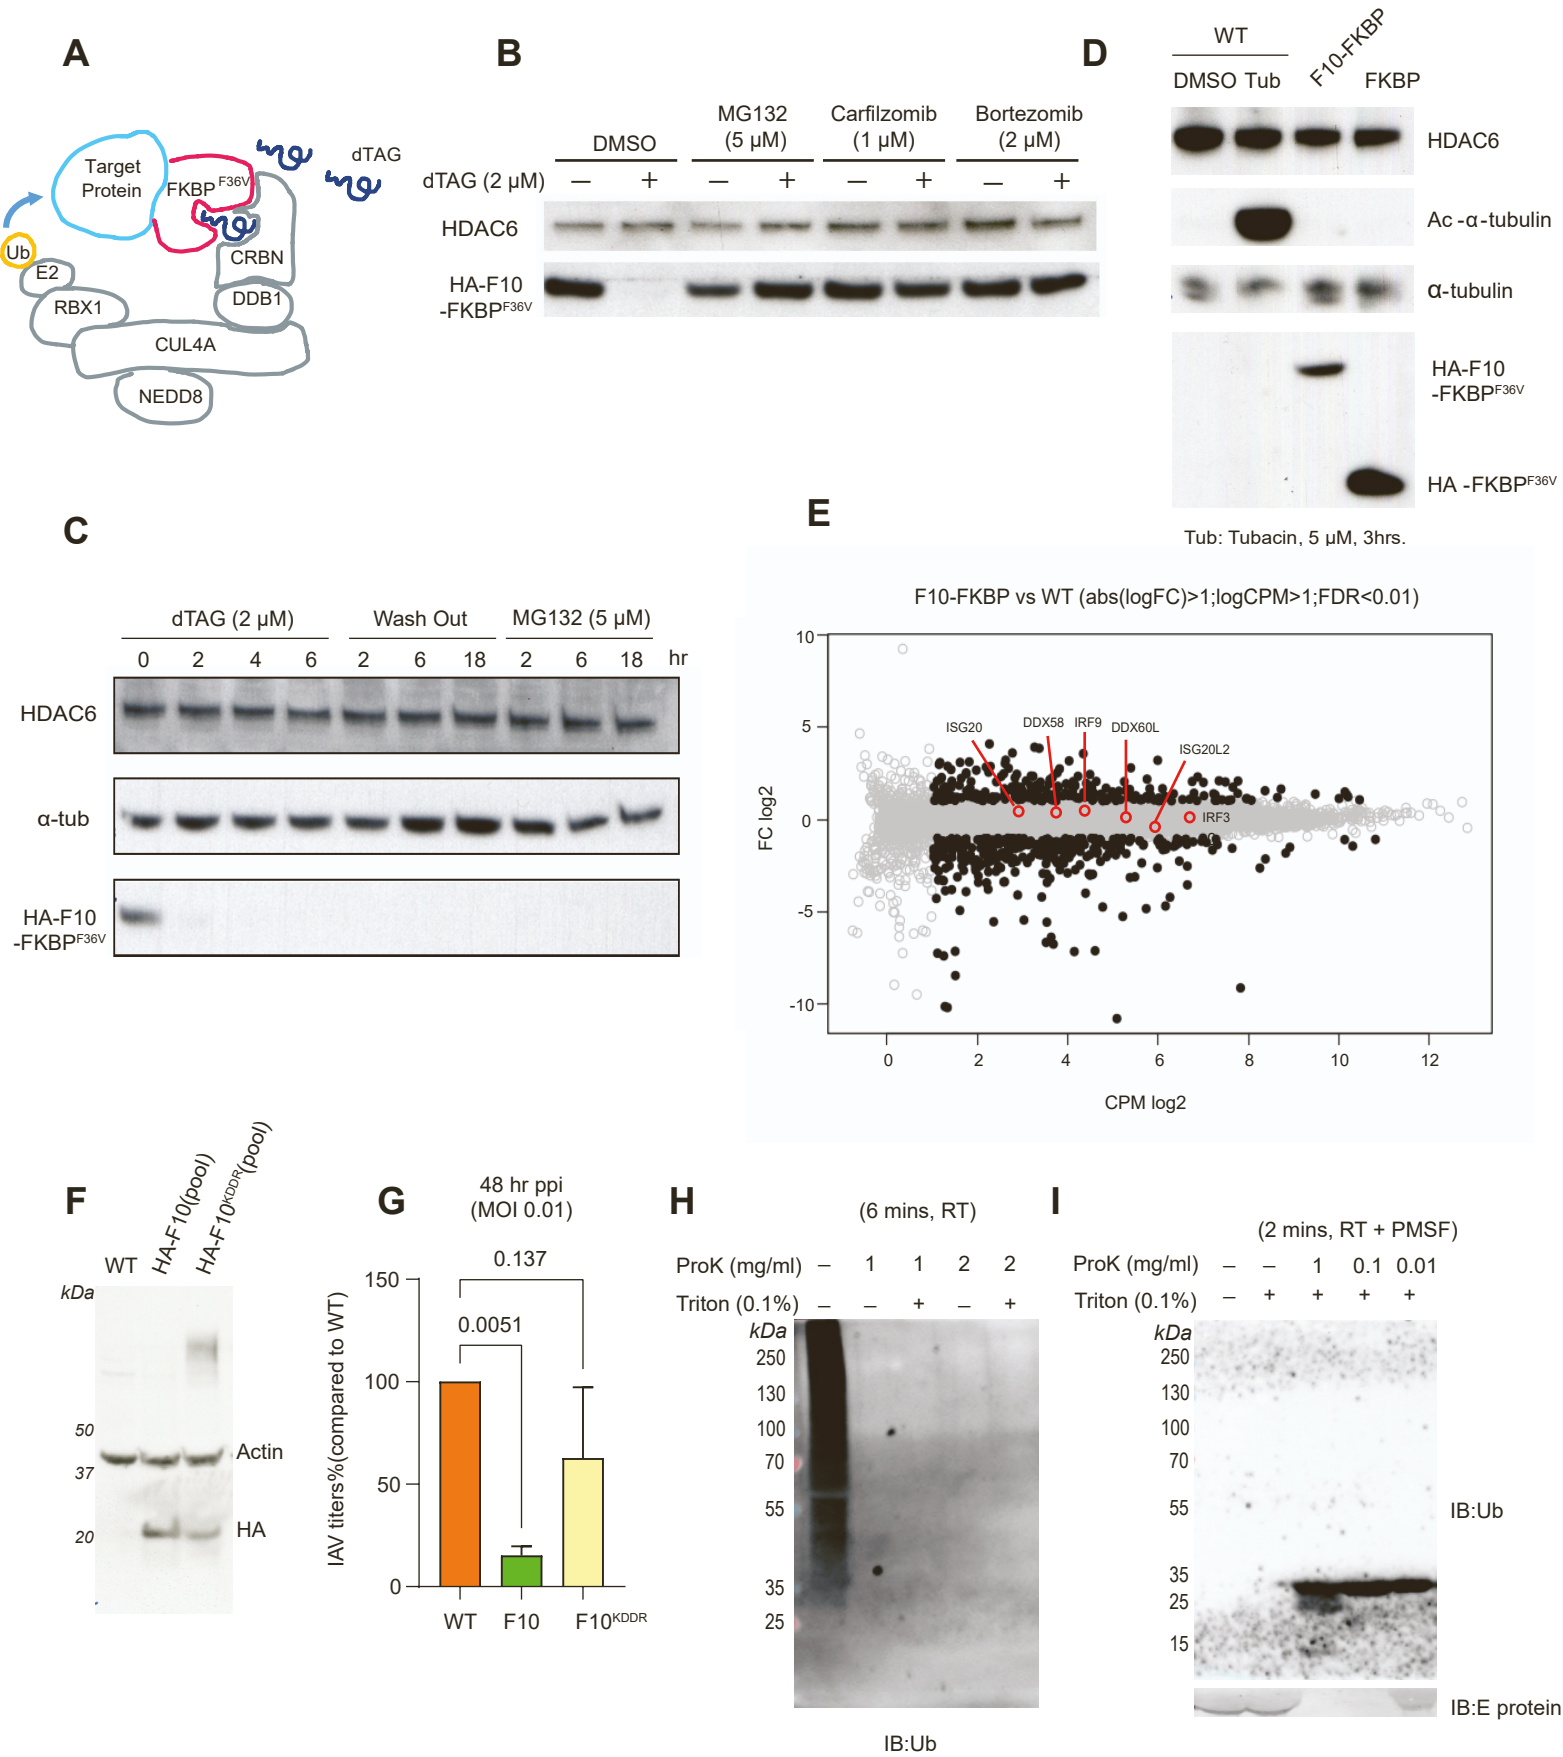

**Figure S5 (related to Figure 3 & 4). Generation of inducible degraded DARPin F10 or F10<sup>KDDR</sup> in A549 cells and ubiquitin presents in ZIKV particle.**

(A) Scheme illustrating the the FKBP<sup>F36V</sup>-dTAG system. The target protein is fused to a mutant version of the immunophilin FKBP, FKBP<sup>F36V</sup>, which selectively binds to the small molecule dTAG-13. This allows recruitment of the Cereblon (CRBN) ubiquitin ligase complex, leading to ubiquitination and ensuing proteasomal degradation of the target protein.

(B) DARPin F10 degradation induced by dTAG is proteasome-dependent. When the F10 cell line was pre-incubated with proteasome inhibitors (MG132 5  $\mu$ M, Carfilzomib 1  $\mu$ M, Bortezomib 2  $\mu$ M for 3 hrs, followed by dTAG treatment for 3 hrs), degradation of DARPin F10 was blocked.

(C) Once degraded, DARPin F10 does not stably reappear for at least 18 hours, even in the presence of proteasomal inhibition. A549 F10 cells were treated with dTAG to induce the degradation of DARPin F10; after 6 hours the medium was changed and replaced by normal medium (wash out) or medium containing MG132 (5  $\mu$ M). Samples were analysed at different time points thereafter to monitor the re-expression of DARPin F10.

(D) F10 does not affect the enzymatic activity of HDAC6, as monitored by  $\alpha$ -tubulin acetylation. The indicated cells (parental A549 cells, F10-FKBP cells and FKBP control cells) were used to examine the level of tubulin acetylation by immunoblotting. As a reference, A549 cells were treated with Tubacin (Tub; 5  $\mu$ M, 3 hrs) to inhibit HDAC6 and elevate  $\alpha$ -tubulin acetylation (2<sup>nd</sup> lane). The bottom panel shows the expression level of the DARPin F10-FKBP<sup>F36V</sup> fusion protein, and of the FKBP<sup>F36V</sup> control.

(E) RNA seq analysis between F10-FKBP cells and WT A549 cells. Genes that are upregulated or downregulated in DARPin F10 expressing cells are indicated in black. LogFC>1, LogCPM>1, FDR<0.05. Several interferon pathway genes are indicated, all of which show no significant change in expression.

(F) Generation of HA-F10 and HA-F10<sup>KDDR</sup> cell lines. Lentivirus encoding HA-F10 and HA-F10<sup>KDDR</sup> were used to transduce WT A549 cells and pools of puromycin-resistant cells were established. Cell lysates were used to visualize protein production by immunoblotting with an anti-HA antibody. Actin is an endogenous control.

(G) Wild-type F10, but not F10<sup>KDDR</sup> mutant, reduces IAV infection. A549 WT, HA-F10 and HA-F10<sup>KDDR</sup> cells were infected with IAV (MOI = 0.01) and viral titer in the culture medium was determined at 48 hr post infection by TCID<sub>50</sub> method (n=3). The baseline titer obtained with A549 WT cells was set to 100%. Statistical analysis was done with one-way ANOVA test, p-values are shown in the graph. Data are represented as mean  $\pm$  SD.

(H) Optimization of proteinase K treatment on ZIKV particles. ZIKV (Puerto Rico strain; titer = 10<sup>8</sup>/mL) was treated with proteinase K (RT<sup>o</sup>, 6 min) or Triton X-100 as indicated. Samples were analysed by immunoblotting with an anti-Ub antibody. The leftmost lane shows undigested material which exhibits a strong Ub smear signal. The proteinase K-treated samples were overdigested and no Ub signal is visible.

(I) Ubiquitin presence inside ZIKV particles. The same ZIKV strain (another preparation with lower titer = 10<sup>7</sup>/mL) and reagents were used as in (A), but the proteinase K treatment was decreased to 2 min at RT<sup>o</sup> and immediately inactivated by 1 mM PMSF. The samples were analysed by immunoblotting with an anti-Ub antibody and anti-ZIKA E protein antibody.

Figure S6

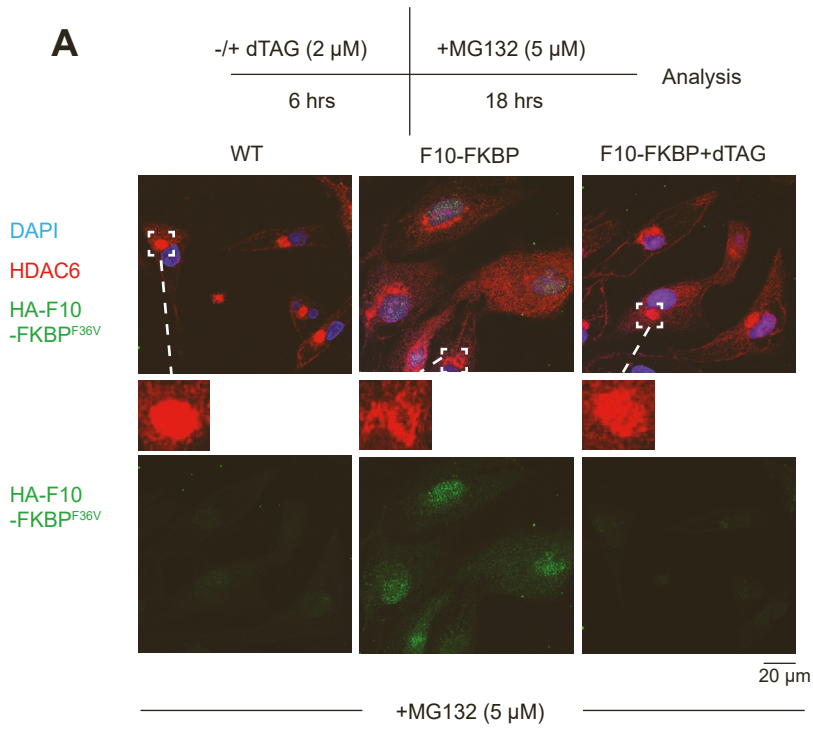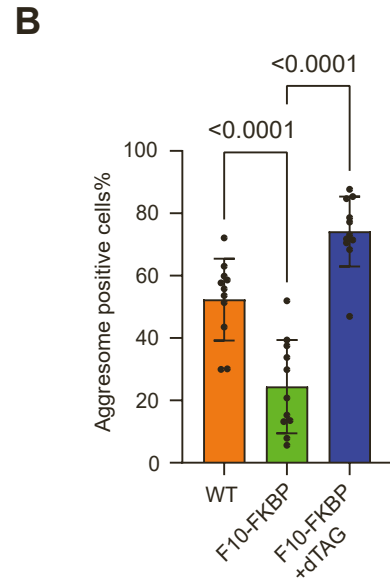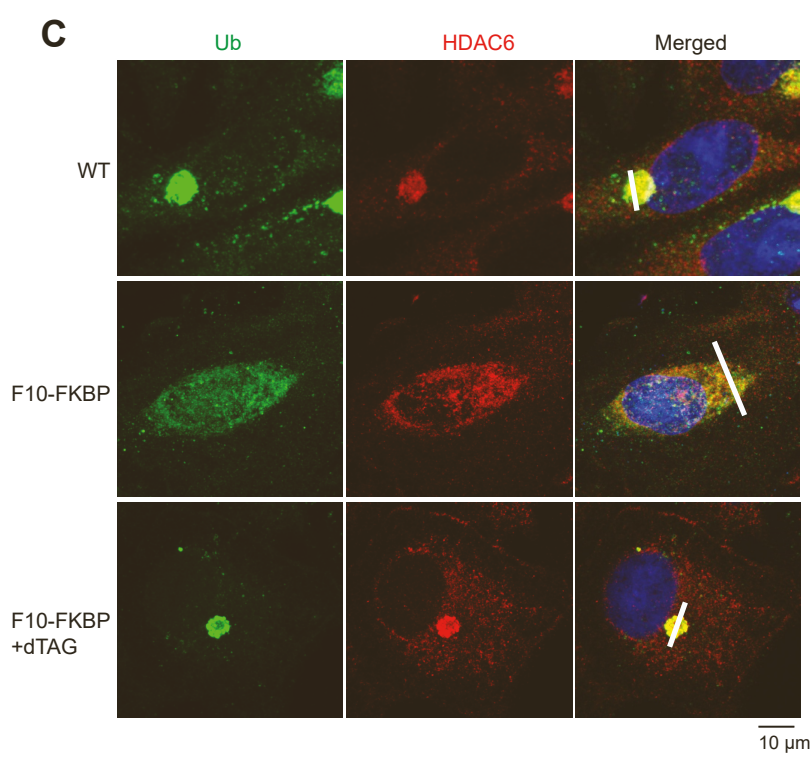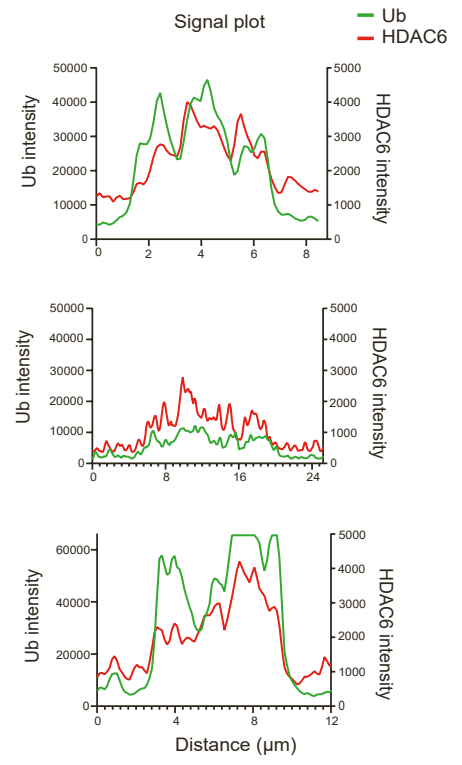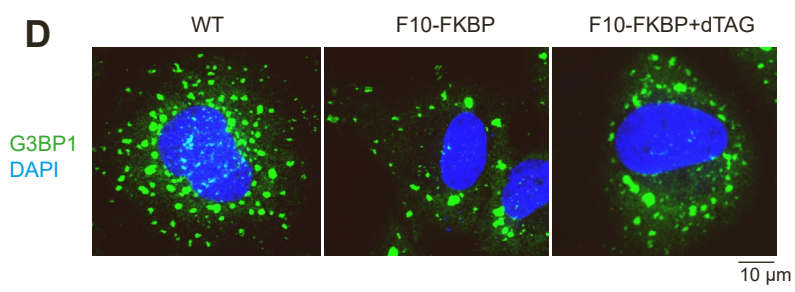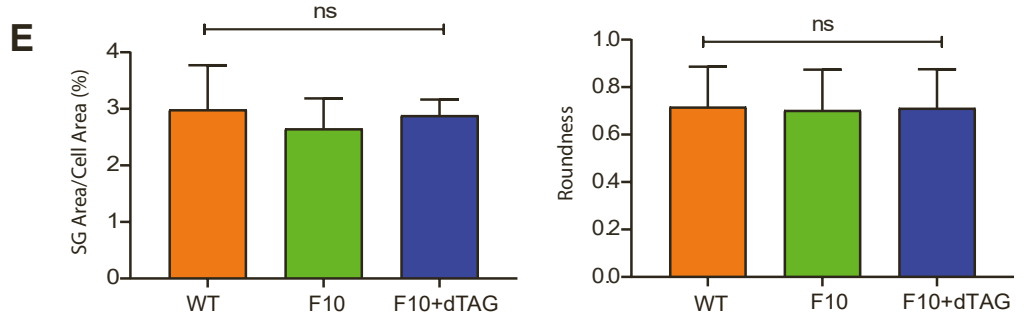

**Figure S6 (related to Figure 5). Aggresome quantification with HDAC6 and representative pictures for aggresomes and SGs.**

(A) Aggresome formation was induced with MG132 in parental A549 and F10-FKBP cells without or with dTAG pre-treatment to investigate the impact of the DARPIn on aggresome formation. Aggresomes were detected by staining with an anti-HDAC6 antibody and DARPIn F10 expression was visualized with an anti-HA antibody. DAPI was used to stain the nucleus. The inset shows a magnified view of an aggresome; representative pictures are shown. The scale bar represents 20  $\mu\text{m}$ .

(B) Quantification of aggresome formation in parental A549 cells, or F10-FKBP cells without or with dTAG pre-treatment (n=2). The graph shows the percentage of aggresome-positive cells; each data point represents the percentage obtained in a randomly taken micrograph containing 50 to 100 cells. Statistical analysis was done by one-way ANOVA, p-values are shown in the graph. Data are represented as mean  $\pm$  SD.

(C) Zoom-ins of aggresomes. Left and middle pictures illustrate the inhibition of aggresome formation by F10 (visualized by Ub and HDAC6 staining). The scale bar represents 10  $\mu\text{m}$ .

The graphs on the right show the signal intensity for ubiquitin and HDAC6 across the aggresome or the perinuclear area (location shown as a white line in the pictures); note the different scale between Ub and HDAC6 signals.

(D) Example of F10 inhibition on SGs formation. Stress granules were visualized by staining with an anti-G3BP1 antibody (green). The scale bar represents 10  $\mu\text{m}$ .

(E) SGs were induced with arsenite (1 mM, 30 min) in parental A549 cells or in F10-FKBP cells without or with dTAG pre-treatment (pre-incubation 2  $\mu\text{M}$  for 6 hrs) and were visualized by staining for G3BP1. Representative pictures are shown in Figure 5. Left: quantification of the size of SGs per cell area. Right: shape (roundness) of SGs, as analyzed by ImageJ stress granule counter. Statistical analysis (n = 3) was done by one-way ANOVA test; ns, not significant. Data are represented as mean  $\pm$  SD.

**Table S2 Data collection and refinement statistics, Related to Figure 2**

| DARPin F10-HDAC6 ZnF                                    |                                       |
|---------------------------------------------------------|---------------------------------------|
| <b>Data collection</b> <sup>1</sup>                     |                                       |
| Space group                                             | P 32 2 1                              |
| Cell dimensions                                         |                                       |
| <i>a</i> , <i>b</i> , <i>c</i> (Å)                      | 81.39, 81.39, 103.64                  |
| $\alpha$ , $\beta$ , $\gamma$ (°)                       | 90.00, 90.00, 120.00                  |
| Resolution (Å)                                          | 58.29 – 2.43 (2.63-2.43) <sup>2</sup> |
| <i>R</i> <sub>merge</sub>                               | 0.078 (1.883)                         |
| <i>R</i> <sub>pim</sub>                                 | 0.033 (0.752)                         |
| <i>I</i> / $\sigma$ <i>I</i>                            | 19.0 (1.4)                            |
| <i>CC</i> <sub>1/2</sub> (%)                            | 99.9 (58.9)                           |
| Wilson B-factor                                         | 64.61                                 |
| Completeness (ellipsoidal)(%)                           | 94.4 (75.6) <sup>3</sup>              |
| Redundancy                                              | 10.5 (11.6)                           |
| Anomalous completeness (ellipsoidal)                    | 94.4 (76.2)                           |
| Anomalous multiplicity                                  | 5.6 (6.2)                             |
| <b>Experimental Phasing</b>                             |                                       |
| FOM <sup>4</sup> (%)                                    | 27.3                                  |
| <b>Refinement</b>                                       |                                       |
| Resolution (Å)                                          | 58.29 – 2.43                          |
| No. reflections used in refinement                      | 11396                                 |
| <i>R</i> <sub>work</sub> / <i>R</i> <sub>free</sub> (%) | 21.66/24.98                           |
| No. atoms (non hydrogen)                                | 2054                                  |
| Protein                                                 | 2029                                  |
| Ligand/ion                                              | 33                                    |
| Water                                                   | 10                                    |
| <i>B</i> -factors (Å <sup>2</sup> )                     | 78.11                                 |
| Protein                                                 | 78.26                                 |
| Ligand/ion                                              | 69.18                                 |
| Water                                                   | 59.61                                 |
| R.m.s. deviations                                       |                                       |
| Bond lengths (Å)                                        | 0.003                                 |
| Bond angles (°)                                         | 0.59                                  |
| Molprobrity score                                       | 1.32                                  |
| Clashscore                                              | 2.73                                  |
| Ramachandran favored (%)                                | 96.20                                 |
| Ramachandran outliers (%)                               | 0                                     |
| Rotamer outliers (%)                                    | 0                                     |

1) Data collected from a single crystal

2) Values in parentheses are for the highest-resolution shell

3) From *STARAN/ISO* assuming a local *I* /  $\sigma$ *I* = 1.2 resolution cutoff

4) Before density modification

**Table S4. Oligonucleotide primers used in this paper, Related to STAR Methods**

| Primer name                                  | Forward                                                      | Reverse                                                   |
|----------------------------------------------|--------------------------------------------------------------|-----------------------------------------------------------|
| qPCR_RIG-I                                   | AGCACTTGTGGACGCTTT<br>A                                      | GGTCATTCTGTGTTCT<br>GATTTG                                |
| qPCR_IFN-β                                   | CTTCTCCACTACAGCTCTT<br>TCC                                   | GCCAGGAGGTTCTCAA<br>CAATA                                 |
| qPCR_ISG15                                   | GAGCATCCTGGTGAGGA<br>ATAAC                                   | CGCTCACTTGCTGCTTC<br>A                                    |
| qPCR_IFN-γ                                   | GGGTTCTCTTGGCTGTTA<br>CT                                     | CTTGATGGTCTCCACAC<br>TCTT                                 |
| qPCR_ZIKA E gene                             | CGYTGCCCAACACAAGG                                            | CCACYAAYGTTCTTTTG<br>CABACAT                              |
| qPCR_Actin                                   | AGCCTCGCCTTTGCCGAT<br>C                                      | AGCGGGCGATATCATC<br>ATCC                                  |
| qPCR_GADPH                                   | ACATCGCTCAGACACCAT<br>G                                      | TGTAGTTGAGGTCAAT<br>GAAGGG                                |
| qPCR_18S                                     | CGCCGCTAGAGGTGAAA<br>TTC                                     | GGCAAATGCTTTTCGCT<br>CTG                                  |
| pOPINF-His-HDAC6(1108-1215)                  | GGTCTGGAAGTTCTGTTT<br>CAGGGCCCGACACCACT<br>GCCCTGGTGTCCC     | AATCACAAACTGGTCT<br>AGAAAGCTTTAGTGTG<br>GGTGGGGCATATCCTC  |
| pOPINF-His-Avi-HDAC6(1108-1215)              | AGCAGCGAATTCAGCGG<br>CTTAAATGACATATTCGA<br>AGCTCAGAAAATAGAGT | AATCACAAACTGGTCT<br>AGAAAGCTTTAGTGTG<br>GGTGGGGCATATCCTC  |
| pLenti-Puro-Flag-HA-F10-FKBP <sup>F36V</sup> | GCTGGTGGAGGTGGAGG<br>TTCTGGATCCGACCTGGG<br>TAAGAACT          | AGCTTGGTACCGAGCT<br>CGGATCTTATTCCAGTT<br>TTAGAAGCTCCACATC |
| pLenti-Puro-Flag-HA-FKBP <sup>F36V</sup>     | TTACGCTGGTGGAGGTG<br>GAGGTTCTGGAGTGCA<br>GTGGAAACCATCTC      | CTCCTCGCCCTTGCTCA<br>CCATTTCCAGTTTTAGA<br>AGCTCCACATC     |
| pcDNA3.1-GFP (1-9)                           | AATTCGCCACCATGGTGA<br>GCAAGGG                                | AATTTTAGGGCAGCAG<br>CACGGGGC                              |
| pcDNA3.1-GFP (10)-Ub                         | GGCCACCATGGACCTGCC<br>AGACGA                                 | CTTAACCACCTCTCAG<br>ACGCAGGA                              |
| pcDNA3.1-GFP (11)-ZnF                        | TGGCCACCATGGAGAAG<br>AGGG                                    | TATGCCCCACCCACACT<br>AAAG                                 |
| pcDNA3.1-GFP (11)-ZnF (W1182A)               | TGGCCACCATGGAGAAG<br>AGGG                                    | TATGCCCCACCCACACT<br>AAAG                                 |
| pcDNA3.1-mRuby                               | TATGGCTAGCATGACTGG<br>T                                      | ATTTAGGTGACACTATA<br>G                                    |
| Q5_F10_K47A                                  | CCTGGCTGCTGACGCAG<br>GTCACCT                                 | TGCAGCGGAGTAACAC<br>CG                                    |
| Q5_F10_D67A                                  | AACGCTATCGCCATCATG<br>GGTGC                                  | AACGTCAGCACCGGTT<br>TTCAGC                                |
| Q5_F10_D100A                                 | CGCTATGGCCATAAAG<br>GTTTCA                                   | TTAACGTCAGCGCCGG<br>CCTT                                  |
| Q5_F10_R113A                                 | CTGGCTGCTTGGGCTGGT<br>CACCT                                  | GTGCAGCGGAGTGAAA<br>CCT                                   |
| Plenti-HA-F10_WT & Mut                       | CCGACCTCTCTCCCAGG<br>GGGCCACCATGGTGTATC<br>CGTATGATGTGCCGGAT | TAATCCAGAGGTTGAT<br>TGTCGATTAATTAAGCT<br>TAGCAGCTTTCT     |
